# Supplementary figures and images for: A rational synthetic route leading to 3d–3d′–4f heterospin systems: self-assembly processes involving heterobinuclear 3d–4f complexes and hexacyanometallates
Source: Royal Society of Chemistry journal article supplement (doi:10.1039/b310082k), 2003-01-01

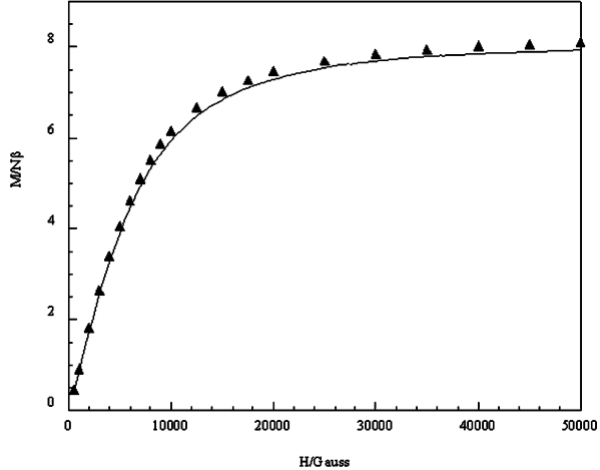

Supplement: b310082k.pdf [file b310082k.pdf]
